# Supplementary material for: GenomeTester4: a toolkit for performing basic set operations - union, intersection and complement on k-mer lists
Source: PubMed Central journal article supplement (PMC4669650; doi:10.1186/s13742-015-0097-y), 2015-12-03
Supplement: 13742_2015_97_MOESM1_ESM.pdf [file 13742_2015_97_MOESM1_ESM.pdf]

# GenomeTester4 file format

GenomeTester4 k-mer list is binary file, encoded in little-endian (x86 default) byte order. It is composed of header and table parts.

Header (40 bytes)

| datatype | bytes | name             | description                                                                 |
|----------|-------|------------------|-----------------------------------------------------------------------------|
| byte[4]  | 4     | code             | 'C','4','T','G', used as a “magic” tag to identify GenomeTester list files. |
| int32    | 4     | major version    | used to check the compatibility of the list with GenomeTester program       |
| int32    | 4     | minor version    | used to check the compatibility of the list with GenomeTester program       |
| int32    | 4     | word length      | k-mer length                                                                |
| int64    | 8     | number of words  | the number of unique k-mer entries in the table part of file                |
| int64    | 8     | number of k-mers | the total number of k-mers in sequence                                      |
| byte[8]  | 8     | padding          | reserved for future versions                                                |

The table section follows immediately after the end of header. The table is composed of interleaved k-mers (encoded as 64 bit integer) and their counts (stored in 32 bit integer). Each k-mer entry thus uses 12 bytes in the table.

K-mers are encoded with the following bit pattern:

A    00  
C    01  
G    10  
T    11

The 3' end of k-mer is always stored in least significant two bits (0-1) of the integer. If the length of k-mer is less than 32 bp, the unused significant bits are filled with zeros.
