# Supplementary material for: GenomeTester4: a toolkit for performing basic set operations - union, intersection and complement on k-mer lists
Source: PubMed Central journal article supplement (PMC4669650; doi:10.1186/s13742-015-0097-y), 2015-12-03
Supplement: 13742_2015_97_MOESM3_ESM.pdf [file 13742_2015_97_MOESM3_ESM.pdf]

# Protocol

Locating novel X and Y chromosome specific repeats in cow genome (Bos taurus 4.6.1).

We expected that repeated regions have at least some common 16-mers and these 16-mers are not present in other chromosomes in significant numbers. We used cutoff 2 (i.e. at most single occurrence) for comparing autosomes and cutoff 1 (i.e. not a single occurrence) for comparing with other sex chromosome.

1. Created separate 16-mer lists X and Y chromosomes

```
glistmaker chrX.fa -w 16  
Running time: 0m29.400s  
NUnique 55340218  
NTotal 83004526  
glistmaker chrY.fa -w 16  
Running time: 0m11.759s  
NUnique 3869143  
NTotal 38719749
```

2. Created single 16-mer list for all autosomes

```
glistmaker autosomes.fa -w 16  
Running time: 5m53.680s
```

3. Created subsets of all k-mers that occur at least 10 times in sex-chromosome lists

```
glistcompare chrX.fa_16.list chrX.fa_16.list -i -c 10 -o X_ge10  
Running time: 0m1.596s  
NUnique 311364  
NTotal 17923151  
glistcompare chrY.fa_16.list chrY.fa_16.list -i -c 10 -o Y_ge10  
Running time: 0m0.155s  
NUnique 419403  
NTotal 33884614
```

4. Subtracted the autosome list from repeated k-mer lists using cutoff 2

```
glistcompare X_ge10_16_intrsec.list autosomes_16.list -d -c 2 -o X_ge10_A_lt2  
Running time: 0m12.151s  
NUnique 2629  
NTotal 17638  
glistcompare Y_ge10_16_intrsec.list autosomes_16.list -d -c 2 -o Y_ge10_A_lt2  
Running time: 0m12.505s  
NUnique 117479  
NTotal 3756977
```

5. Subtracted other sex-chromosome list from repeated and unique k-mer lists using cutoff 1

```
glistcompare X_ge10_A_lt2_16_0_diff1.list chrY.fa_16.list -d -c 1 -o X_ge10_A_lt2_Y_lt1  
Running time: 0m0.102s  
NUnique 2461  
NTotal 37970  
glistcompare Y_ge10_A_lt2_16_0_diff1.list chrX.fa_16.list -d -c 1 -o Y_ge10_A_lt2_X_lt1  
Running time: 0m1.023s
```

NUnique 112387

NTotal 6998558

As there were 112387 Y-specific k-mers we further removed those that had more than 50 copies to get rid of well-known repeats.

6. Created subset of all k-mers that occur at least 50 times Y list

```
glistcompare Y_ge10_16_intrsec.list Y_ge10_16_intrsec.list -i -c 50 -o Y_ge50
```

Running time: undetectable

NUnique 259986

NTotal 29972854

7. Subtracted the list of k-mers of over 50 copies from the list of Y-specific k-mers

```
glistcompare Y_ge10_A_lt2_X_lt1_16_0_diff1.list Y_ge50_16_intrsec.list -d -c 1 -o
```

```
Y_ge10_lt50_A_lt2_X_lt1
```

Running time: undetectable

NUnique 49950

NTotal 1183903

We got in total 2461 X-specific and 49950 Y-specific k-mers.

The next step in analysis was finding regions in chromosome which had significant overrepresentation of unique repeated k-mers, using custom Perl script find\_regions.pl.

Finding MA > 4, length 100 regions

Y: 2080 regions

X: 88 regions

Blast regions against themselves to locate similarity groups. Collated groups and chose representative sequence.

Scripts:

```
collate_repeats.pl
```

```
filter_collated.pl
```

```
unique.pl
```

Finally we did new BLAST search of identified repeat sequences against the whole genome and filtered truly unique repeats

```
filter_final.pl
```

In total we found 319 repeats (11 for X and 308 for Y chromosome).
